# Supplementary material for: Codon-by-Codon Modulation of Translational Speed and Accuracy Via mRNA Folding
Source: PubMed Central journal article supplement (PMC4106722; doi:10.1371/journal.pbio.1001910), 2014-07-22
Supplement: pbio.1001910.s001.pdf [file pbio.1001910.s001.pdf]

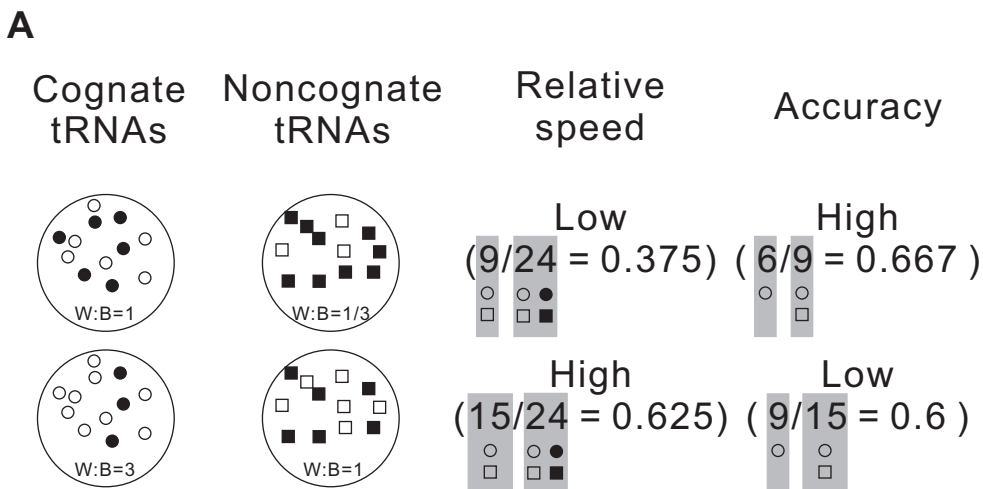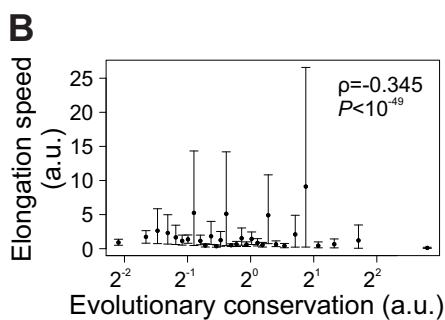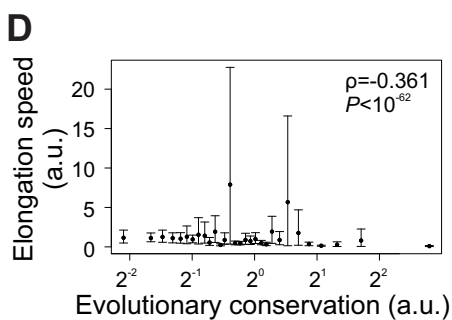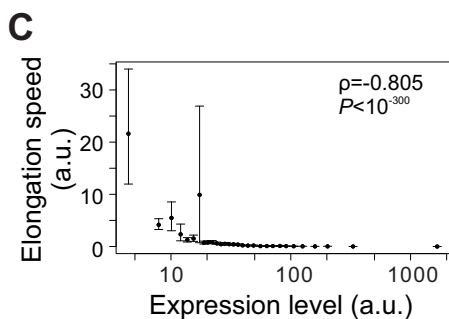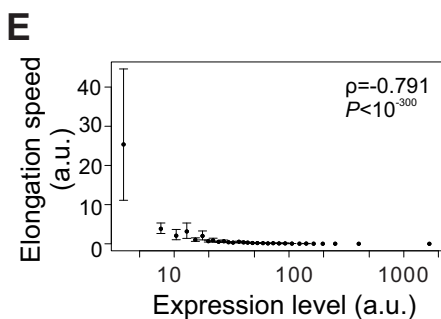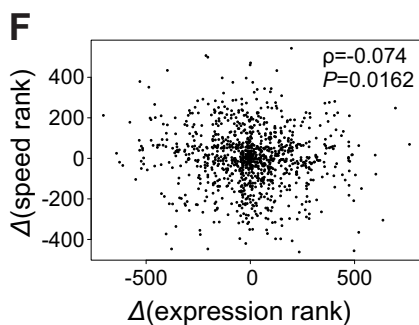

Figure S1
